# Supplementary material
Source: HighWire-hosted journal article supplement (https://bibliotheek.ehb.be:2640/highwire/filestream/185676/field_highwire_adjunct_files/1/jmg-2022-108523supp002_data_supplement.pdf)
Supplement: jmg-2022-108523supp002_data_supplement.pdf [file jmg-2022-108523supp002_data_supplement.pdf]

|                                              | N215S   |        | Non-N215S |           |
|----------------------------------------------|---------|--------|-----------|-----------|
|                                              | Male    | Female | Male      | Female    |
| n(%)                                         | 5(14)   | 13(36) | 10(28)    | 8(22)     |
| Age (years), mean(SD)                        | 52.4±11 | 55.3±8 | 53.5±7.8  | 55.25±9.6 |
| Diagnosed Fabry Disease                      | 1       | 0      | 1         | 1         |
| Cardiovascular disease, n(%)                 | 2       | 3      | 4         | 1         |
| Hearing impairment, n(%)                     | 0       | 0      | 0         | 1         |
| CKD-EPI eGFR<br>mls/min/1.73m <sup>2</sup> * | 98±12   | 91±12  | 90±15     | 85±18     |
| Microalbuminuria #                           | 2       | 3      | 3         | 0         |

Supplementary table 1: Phenotype data when analysed by presence of N215S data versus non-N215S variants. (\*creatinine missing for 1 female, #ACR missing for 1 male).
